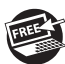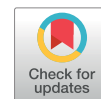

RESPONSE TO COMMENT ON NORHAMMAR ET AL.

# Undetected Dysglycemia Is an Important Risk Factor for Two Common Diseases, Myocardial Infarction and Periodontitis: A Report From the PAROKRANK Study. *Diabetes Care* 2019;42:1504–1511

*Diabetes Care* 2020;43:e9 | <https://doi.org/10.2337/dci19-0055>

We are grateful for the interest in our article (1) and the well-taken question raised by Li et al. (2). In previous reports from our group (3,4) we underlined that classification as impaired fasting glucose (IFG) will miss a large proportion of patients with dysglycemia (impaired glucose tolerance [IGT] and newly detected diabetes) disclosed by 2-h glucose levels after an oral glucose tolerance test. Moreover, we noted that, in the presence of a postload glucose level, fasting glucose and IFG did not contain any independent prognostic information regarding future cardiovascular mortality or morbidity (5,6). Based on these findings, we categorized the patients as having IGT or new diabetes according to the 2-h glucose level after an oral glucose tolerance test. A further reason was that IFG and prediabetes have no ICD codes in the Swedish medical reporting system. Thus, we did not focus on reporting or excluding IFG.

In the near future we will obtain additional long-term cardiovascular outcome data on the PAROKRANK cohort and will then include IFG as a prognostic marker for cardiovascular disease and also analyze how IFG interacts with periodontitis in patients and control subjects.

**Duality of Interest.** No potential conflicts of interest relevant to this article were reported.

## References

- Norhammar A, Kjellström B, Habib N, et al. Undetected dysglycemia is an important risk factor for two common diseases, myocardial infarction and periodontitis: a report from the PAROKRANK study. *Diabetes Care* 2019;42:1504–1511
- Li H, Tian S, Kong L. Comment on Norhammar et al. Undetected dysglycemia is an important risk factor for two common diseases, myocardial infarction and periodontitis: a report from the PAROKRANK study. *Diabetes Care* 2019;42:

Anna Norhammar,<sup>1,2</sup>  
Barbro Kjellström,<sup>1</sup> Natalie Habib,<sup>1</sup>  
Anders Gustafsson,<sup>3</sup> Björn Klinge,<sup>3,4</sup>  
Åke Nygren,<sup>5</sup> Per Näsman,<sup>6</sup>  
Elisabet Svenungsson,<sup>1</sup> and  
Lars Rydén<sup>1</sup>

1504–1511 (Letter). *Diabetes Care* 2020;43:e8. DOI: 10.2337/dci19-1802

3. Bartnik M, Malmberg K, Hamsten A, et al. Abnormal glucose tolerance—a common risk factor in patients with acute myocardial infarction in comparison with population-based controls. *J Intern Med* 2004;256:288–297

4. Bartnik M, Rydén L, Malmberg K, et al.; Euro Heart Survey Investigators. Oral glucose tolerance test is needed for appropriate classification of glucose regulation in patients with coronary artery disease: a report from the Euro Heart Survey on Diabetes and the Heart. *Heart* 2007;93:72–77

5. Ritsinger V, Tanoglidis E, Malmberg K, et al. Sustained prognostic implications of newly detected glucose abnormalities in patients with acute myocardial infarction: long-term follow-up of the Glucose Tolerance in Patients with Acute Myocardial Infarction cohort. *Diab Vasc Dis Res* 2015;12:23–32

6. Shahim B, De Bacquer D, De Backer G, et al. The prognostic value of fasting plasma glucose, two-hour postload glucose and HbA<sub>1c</sub> in patients with coronary artery disease. A report from EUROASPIRE IV: a survey from the European Society of Cardiology. *Diabetes Care* 2017;40:1233–1240

<sup>1</sup>Department of Medicine, Karolinska Institutet, Stockholm, Sweden

<sup>2</sup>Capio St. Görans Hospital, Stockholm, Sweden

<sup>3</sup>Department of Dental Medicine, Karolinska Institutet, Stockholm, Sweden

<sup>4</sup>Department of Periodontology, Faculty of Odontology, Malmö University, Malmö, Sweden

<sup>5</sup>Department of Clinical Sciences, Danderyds Hospital, Karolinska Institutet, Stockholm, Sweden

<sup>6</sup>Center for Safety Research, KTH Royal Institute of Technology, Stockholm, Sweden

Corresponding author: Anna Norhammar, [anna.norhammar@ki.se](mailto:anna.norhammar@ki.se)

© 2019 by the American Diabetes Association. Readers may use this article as long as the work is properly cited, the use is educational and not for profit, and the work is not altered. More information is available at <http://www.diabetesjournals.org/content/license>.
